# Supplementary material for: Skeletal muscle provides the immunological micro-milieu for specific plasma cells in anti-synthetase syndrome-associated myositis
Source: PubMed Central journal article supplement (PMC9288384; doi:10.1007/s00401-022-02438-z), 2022-05-25
Supplement: 401_2022_2438_MOESM1_ESM.pdf [file 401_2022_2438_MOESM1_ESM.pdf]

**Supplemental Table 1: Staining panels for flow cytometry**

|                | FITC                     | PE                      | ECD                   | PC5.5             | PC7               | APC                | A700              | A750           | BV421                  | BV510             |
|----------------|--------------------------|-------------------------|-----------------------|-------------------|-------------------|--------------------|-------------------|----------------|------------------------|-------------------|
| <b>PANEL 1</b> | CD1c<br>(AD5-8E7)        | CD69<br>(TP1.55.3)      | HLA-DR<br>(Immu-357)  | CD3<br>(UCHT1)    | CD56<br>(N901)    | CD4<br>(13B8.2)    | CD19<br>(J3-119)  | CD16<br>(3G8)  | CD8<br>(B9.11)         | CD14<br>(M5E2)    |
| <b>PANEL 2</b> | IgD<br>(IA6-2)           | CD80<br>(L307.4)        | CD24<br>(ALB9)        | CD38<br>(HIT2)    | CD27<br>(1A4CD27) | CD23<br>(EBVCS-5)  | CD19<br>(J3-119)  | CD20<br>(2H7)  | CD21<br>(HB5)          | IgM<br>(MHM-88)   |
| <b>PANEL 3</b> | CD183<br>(G025H7)        | CD52<br>(REA164)        | CD8<br>(SFC121Thy2D3) | CD194<br>(L29IH4) | CD196<br>(11A9)   | CD56<br>(AF12-7H3) | CD14<br>(M5E2)    | CD3<br>(HIT3a) | CD45RO<br>(UCHL1)      | CD4<br>(13B8.2)   |
| <b>PANEL 4</b> | Helios<br>(22F6)         | FoxP3<br>(PCH101)       | CD4<br>(SFC121T4D11)  | CTLA-4<br>(14D3)  | CD25<br>(B1.49.9) | CD56<br>(AF12-7H3) | CD8<br>(B9.11)    | CD3<br>(HIT3a) | CD45RO<br>(UCHL1)      | CD127<br>(A019D5) |
| <b>PANEL 5</b> | CD45RA<br>(ALB11)        | CD57<br>(QA17A04)       | CD31<br>(WMS9)        | CD56<br>(N901)    | CD27<br>(1A4CD27) | CD226<br>(11A8)    | CD45RO<br>(UCHL1) | CD3<br>(HIT3a) | CD8<br>(B9.11)         | CD4<br>(13B8.2)   |
| <b>PANEL 6</b> | IFN- $\gamma$<br>(4S.B3) | IL-17A<br>(eBio64CAP17) | CD4<br>(SFC121T4D11)  | CD45RO<br>(UCHL1) |                   | CD56<br>(AF12-7H3) | CD8<br>(B9.11)    | CD3<br>(HIT3a) | GM-CSF<br>(BVD2-21C11) | CD146<br>(P1H12)  |
| <b>PANEL 7</b> | TNF- $\alpha$<br>(Mab11) | IL-22<br>(22URTI)       | CD4<br>(SFC121T4D11)  | CD45RO<br>(UCHL1) |                   | CD56<br>(AF12-7H3) | CD8<br>(B9.11)    | CD3<br>(HIT3a) | IL-6<br>(MQ2-13A5)     | CD146<br>(P1H12)  |

**Supplemental Table 2: Gating hierarchy used for flow cytometric analyses**

Lymphocytes: CD45+SSC<sub>low</sub>CD14-

T cells: CD3+CD56-

CD4+ T cells: CD4+CD8-

Naïve: CD45RA+CD27+

CM: CD45RA-CD27+

EM: CD45RA-CD27-

RTE: CD45RA+CD31+

TH1: CD45RO+CCR4-CCR6-CXCR3+

TH2: CD45RO+CCR4+CCR6-CXCR3-

TH17: CD45RO+CCR4+CCR6+CXCR3-

Treg: CD45RO+CD127<sub>low</sub>FoxP3+CD25+

TNF- $\alpha$

IFN- $\gamma$

IL-17

CD8+ T cells: CD8+CD4-

Naïve: CD45RA+CD27+

CM: CD45RA-CD27+

EM: CD45RA-CD27-

TEMRA: CD45RA+CD27-

TNF- $\alpha$

IFN- $\gamma$

IL-17

B cells: CD19<sub>high</sub>CD3-

Naïve: CD20+CD27-IgD+IgM+

Class-switch: CD20+CD27+IgD-IgM-

IgM only: CD20+CD27+IgD-IgM+

Marginal-zone like: CD20+CD27+IgD+IgM+

Transitional: CD20+IgD+IgM+CD38+CD21+CD24+

Plasma cells: CD19<sub>low</sub>CD138<sub>high</sub>

NK cells: CD56+CD3-

NKT cells: CD3+CD56+

Monocytes: CD45+SSC<sub>mid</sub>CD14+

Granulocytes: CD45+SSC<sub>high</sub>CD14-

**Supplemental Table 3: Multiplex analysis of complement factors.**

| <b>Protein Accessions</b> | <b>Genes</b> | <b>Protein Descriptions</b>                                          |
|---------------------------|--------------|----------------------------------------------------------------------|
| <b>P07358</b>             | C8B          | Complement component C8 beta chain                                   |
| <b>P02747</b>             | C1QC         | Complement C1q subcomponent subunit C                                |
| <b>Q07021</b>             | C1QBP        | Complement component 1 Q subcomponent-binding protein, mitochondrial |
| <b>P05156</b>             | CFI          | Complement factor I                                                  |
| <b>P00751</b>             | CFB          | Complement factor B                                                  |
| <b>P02748</b>             | C9           | Complement component C9                                              |
| <b>P08603</b>             | CFH          | Complement factor H                                                  |
| <b>P01024</b>             | C3           | Complement C3                                                        |
| <b>POC0L4</b>             | C4A          | Complement C4-A                                                      |
| <b>P07360</b>             | C8G          | Complement component C8 gamma chain                                  |
| <b>P01031</b>             | C5           | Complement C5                                                        |
| <b>P02746</b>             | C1QB         | Complement C1q subcomponent subunit B                                |

ASyS HC DC

**a** B cell compartment

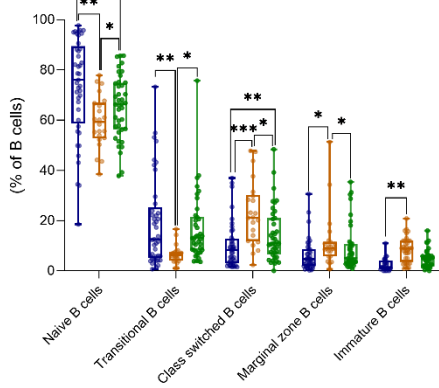

**b** CD4 cell compartment

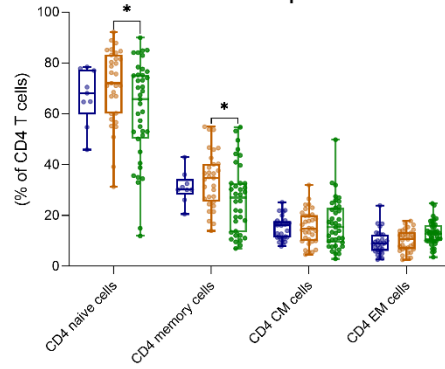

**c** Treg and T helper compartment

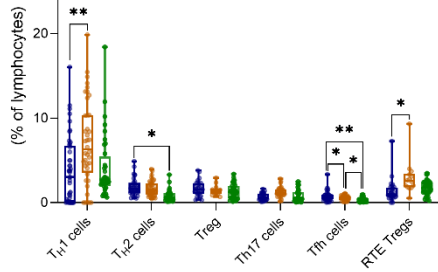

**d** CD8 cell compartment

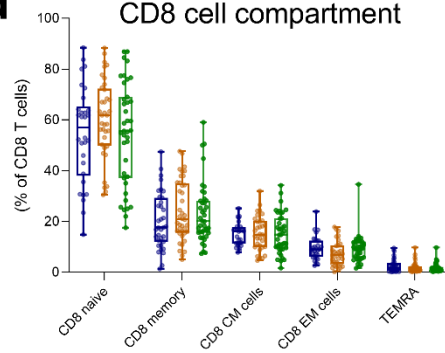

**e** NK cell compartment

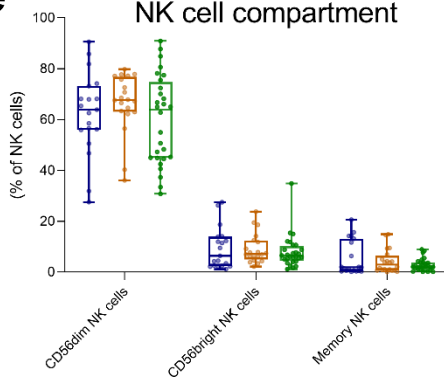

**f** B cell factors

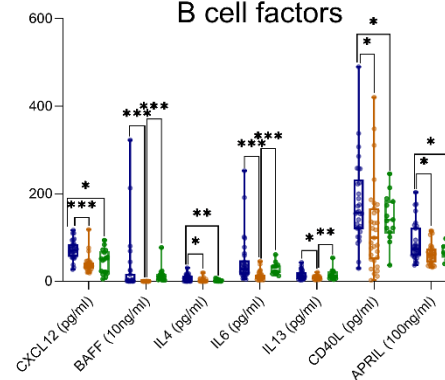

**g** Complement factors

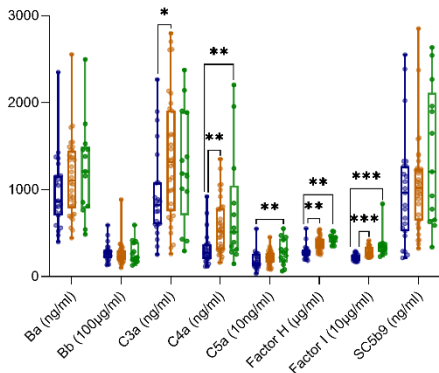

**h** T cell factors

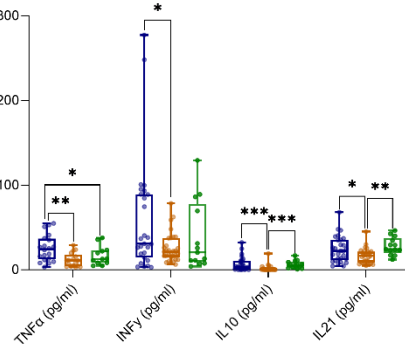

**Supp. Figure 1: Individual immune compartments in ASyS.** In-depth analysis of cellular changes in ASyS patients (n = 36) compared to HC (n = 40) and DC (n = 40) were performed by flow cytometric analysis. The B cell (a), CD4 cell (b), Treg and T helper (c), CD8 cell (d) and NK cell compartment were analyzed. Soluble factors were analyzed by multiplex immunoassay and include B cell (f), complement (g) and T cell factors (h). The Kruskal-Wallis one-way analysis of variance with Dunn's multiple comparison test was used. \* $p < 0.05$ , \*\* $p < 0.01$ , \*\*\* $p < 0.001$ . Abbreviations: ASyS = Anti-synthetase syndrome; BAFF = B-cell activating factor; CM = central memory; DC = diseased control; EM = effector memory; HC = healthy control; IL = interleukin; TEMRA = effector memory T cells re-expresses CD45RA; Tfh = T follicular helper; Th = T helper; RTE = recent thymic emigrates.

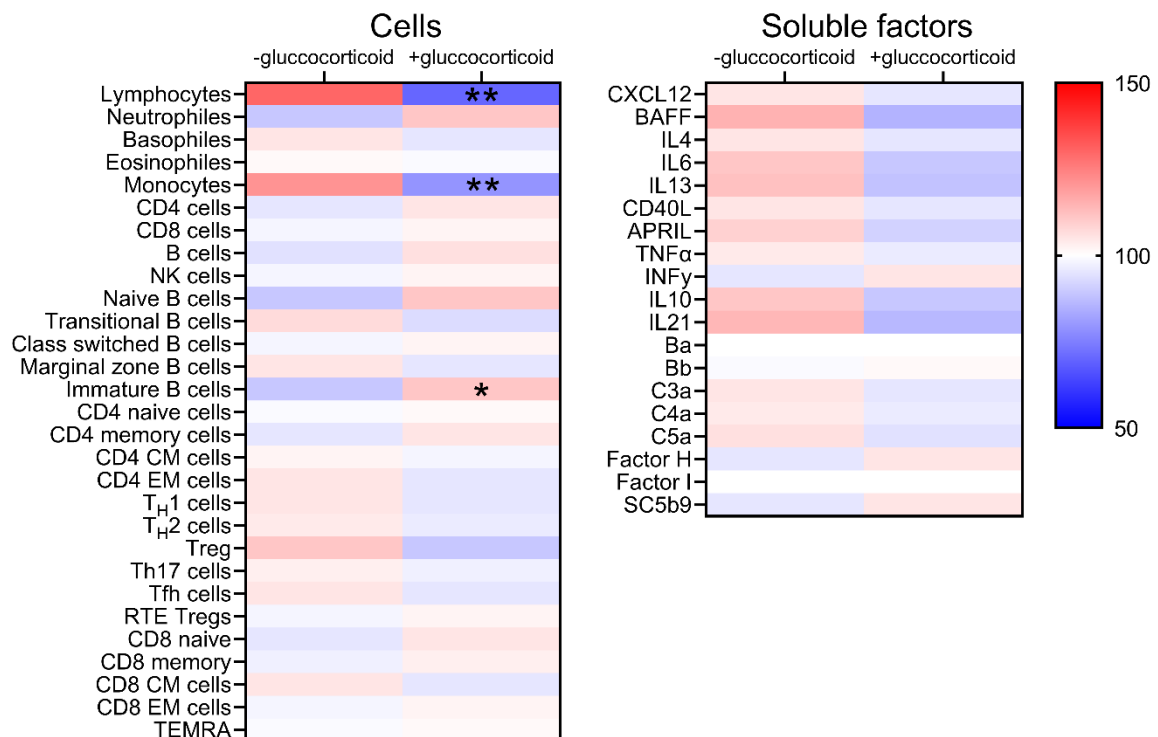

**Supp. Fig. 2:** Comparison of glucocorticoid treatment in ASyS. We compared ASyS patients with glucocorticoid treatment (n = 17) to those without (n = 19). Features of the peripheral immune response were analyzed. Statistical analysis was performed using the Mann-Whitney U test (unpaired comparisons). The level of significance was set to  $p < 0.05$ . \* $p < 0.05$ , \*\* $p < 0.01$ . Abbreviations: ASyS = Anti-synthetase syndrome; BAFF = B-cell activating factor; CM = central memory; DC = diseased control; EM = effector memory; HC = healthy control; IL = interleukin; TEMRA = effector memory T cells re-expresses CD45RA; Tfh = T follicular helper; Th = T helper; RTE = recent thymic emigrates.

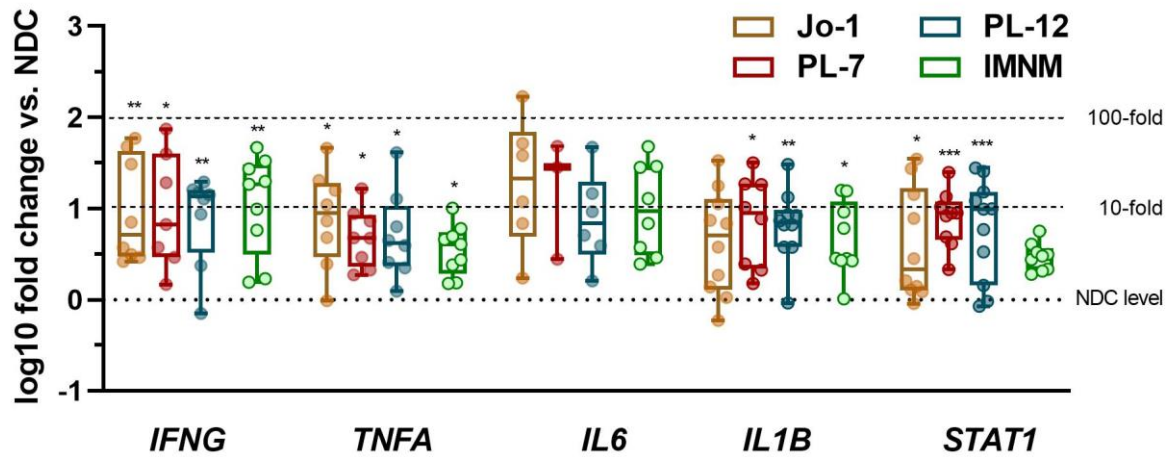

**Supp. Figure 3: Expression levels of type II interferon genes in ASyS.** Box plots displaying the log<sub>10</sub> fold change of indicated gene expression (*IFNG*, *TNFA*, *IL6*, *IL1B*, *STAT1*) in ASyS (Jo-1 n=6, PL7 n=9, PL-12 n=8) subgroups and DC (IMNM n=9) compared to NDCs. Significant differences between ASyS, DC and NDCs are indicated by significance levels above each comparison. Kruskal-Wallis one-way analysis of variance with Dunn multiple comparison test. The level of significance was set to  $p < 0.05$ . \* $p < 0.05$ , \*\* $p < 0.01$ , \*\*\* $p < 0.001$ .

Of note, most PL-7<sup>+</sup> patients had undetectable level of *IL6* and fold-change could not be calculated, hence only three dots are displayed.

*Abbreviations:* ASyS = Anti-synthetase syndrome; DC = disease control; *IFNG* = interferon  $\gamma$ ; *IL* = interleukin; IMNM = immune-mediated necrotizing myopathy; NDC = non-diseased control.

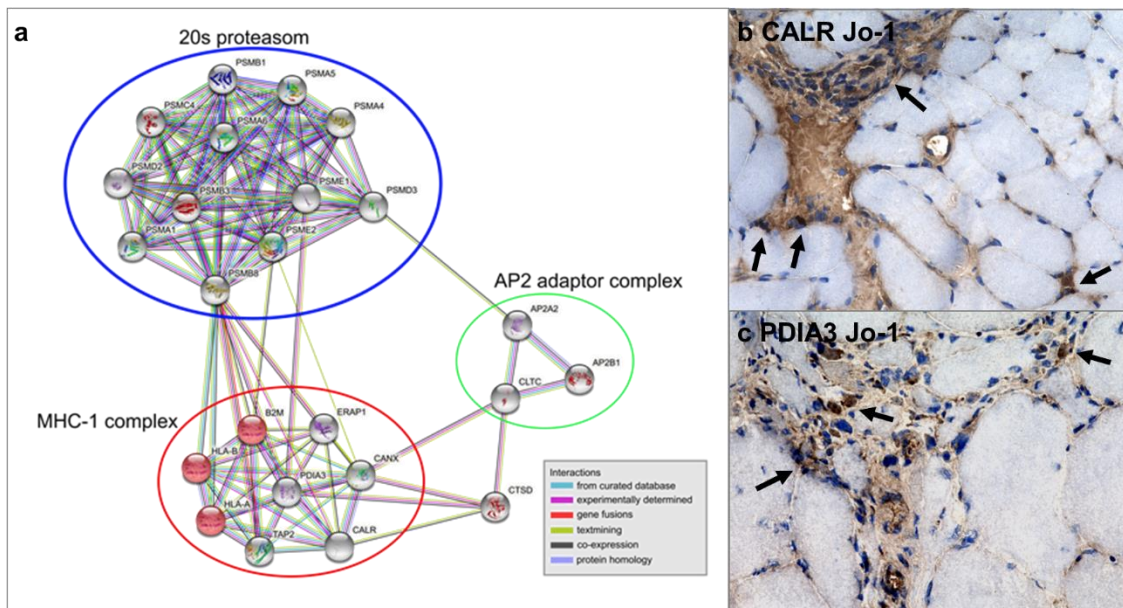

**Supp. Figure 4:** (a) Network analysis of antigen processing antigen presentation and processing using STRING identified the 20s proteasom, the MHC-1 complex and the AP2 adaptor complex in the ASyS proteom. Immunohistochemical analysis of CALR (b) and PDIA3 (c) belonging to the MHC-1 complex. *Abbreviations: ASyS = Anti-synthetase syndrome; CALR = calreticulin; PDIA3 = Protein Disulfide Isomerase Family A Member 3; STRING = Search Tool for the Retrieval of Interacting Genes/Proteins.*

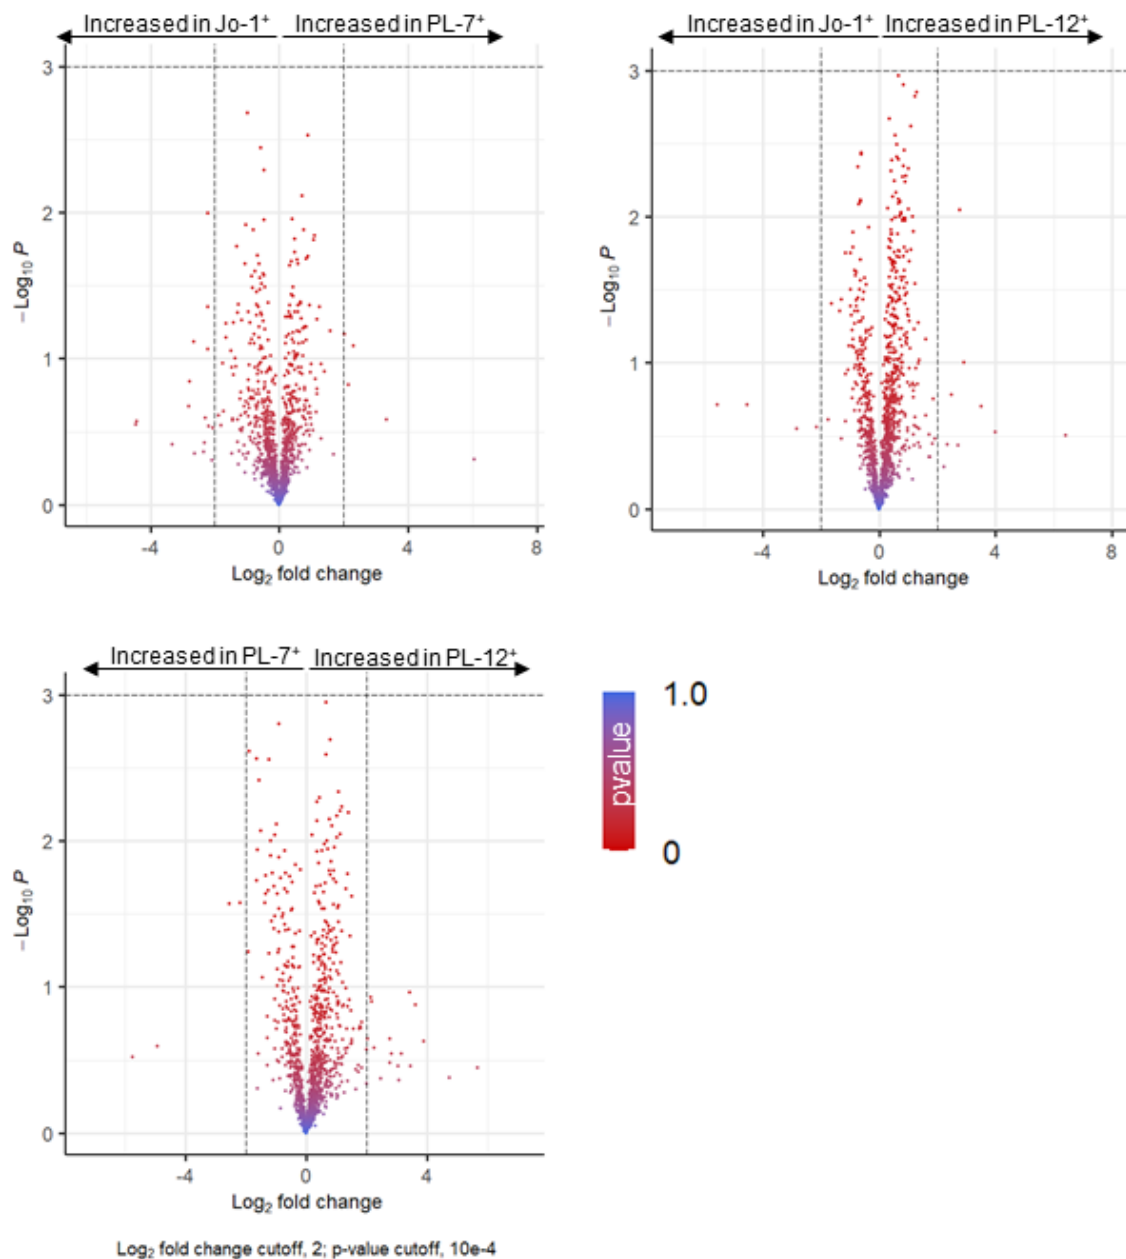

**Supp. Figure 5: Proteome profiles of serological ASyS subgroups.** Proteomic profiling of muscle biopsies from ASyS patients comparing different ASyS subgroups (anti-Jo-1<sup>+</sup> n = 9, anti-PL-7<sup>+</sup> n = 7, anti-PL-12<sup>+</sup> n = 4) displayed as volcano plots. Volcano plots were constructed by calculating the  $\log_2$  fold change of the median and the  $-\log_{10}$  p-value. The  $\log_2$  fold change and p-value cutoff are indicated.

Gene set enrichment analysis for biological processes, cellular components and molecular functions displayed no meaningful differences (data not shown). The significance level was set to  $p$  (FDR) < 0.05. Statistical analysis was performed using the Mann-Whitney U test (unpaired comparisons).

*Abbreviations: ASyS = Anti-synthetase syndrome; FDR = false discovery rate.*

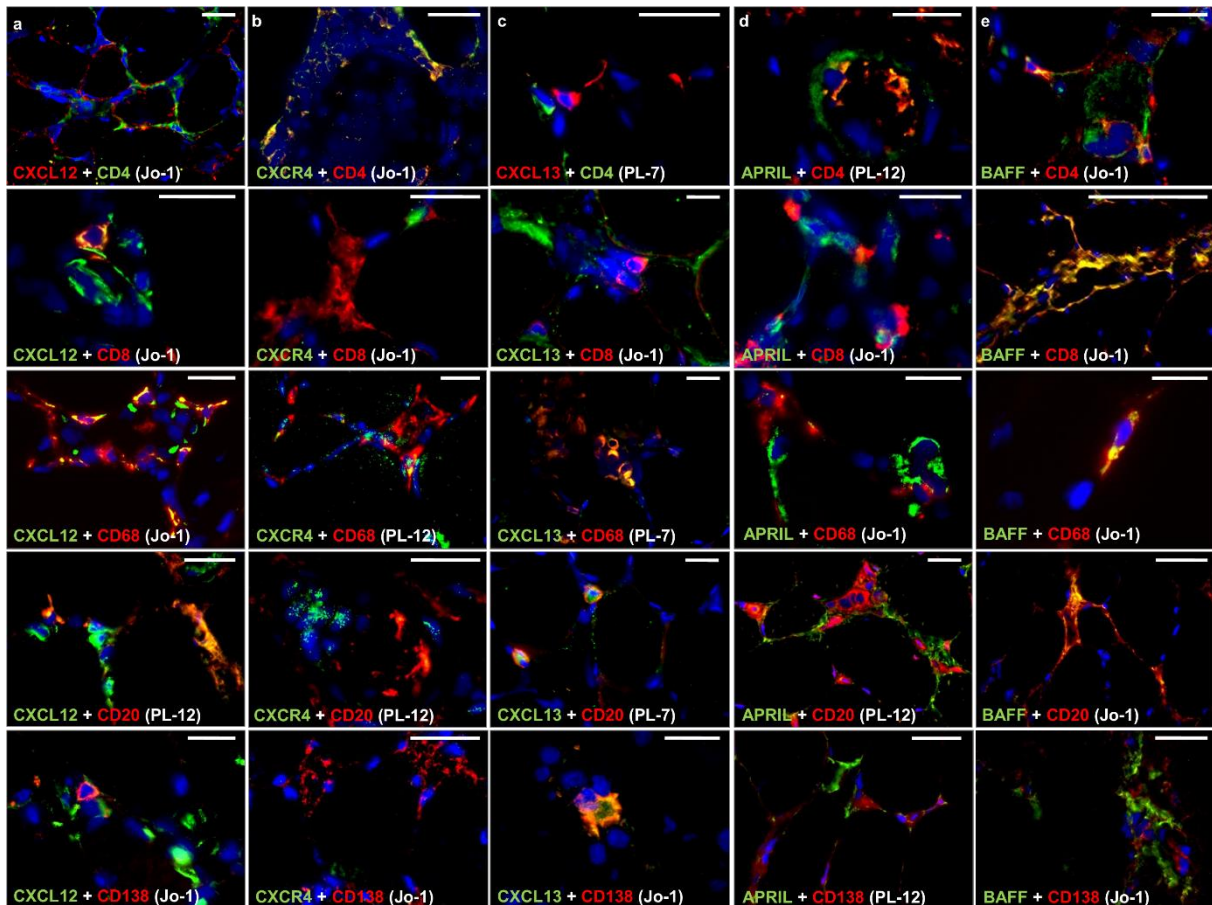

**Supp. Figure 6: Protein expression of BAFF within B cells, but not plasma cells, APRIL is not expressed by either cell type.** Double immuno fluorescence staining reveals co-labelling of homing factors CXCL12 (a) and CXCL13 (c) with multiple cell types, CXCR4 co-labels with T cells (b), while APRIL is not expressed from any of these cells (d). BAFF is expressed by T cells, as well as macrophages and B cells, but not plasma cells (e).

*ASyS = Anti-synthetase syndrome; BAFF = B-cell activating factor.*

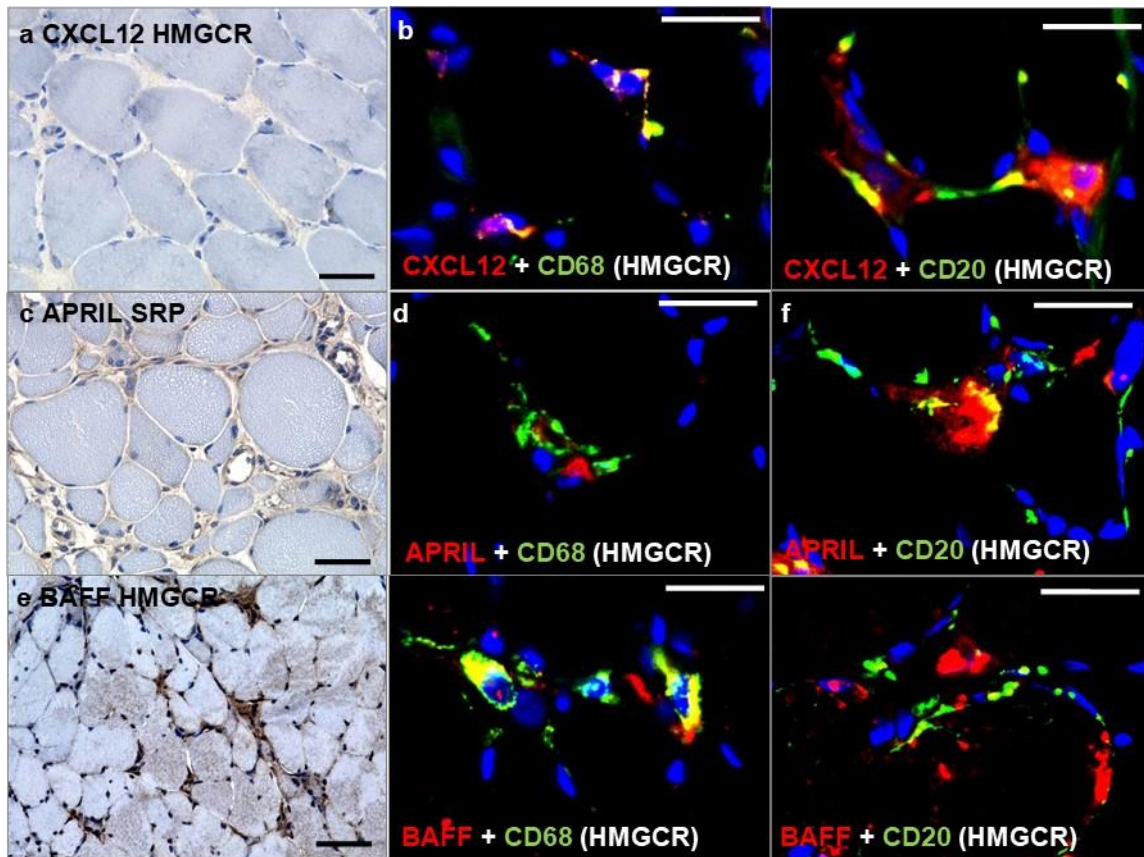

**Supp. Figure 7: Protein expression of interesting factors in DC patients.** Histological staining of CXCL12, APRIL and BAFF in IMNM patients is shown (a, c, e), while double immuno fluorescence staining reveals co-labelling of these factors with multiple cell types.

*IMNM = immune-mediated necrotizing myopathy*
